# Supplementary material for: Diffusion-driven growth of calcium carbonate polymorphs in microchannels
Source: Royal Society of Chemistry journal article supplement (doi:10.1039/d4ra07137a), 2024-01-01
Supplement: d4ra07137a1.pdf [file d4ra07137a1.pdf]

# Electronic Supporting Information: Diffusion-driven growth of calcium carbonate polymorphs in microchannels

Rebeka M. Ádám,<sup>†</sup> Paszkál Papp,<sup>†</sup> Dezső Horváth,<sup>‡</sup> and Ágota Tóth<sup>\*,†</sup>

<sup>†</sup>*Department of Physical Chemistry and Materials Science, University of Szeged, Rerrich Béla tér 1., Szeged, H-6720, Hungary*

<sup>‡</sup>*Department of Applied and Environmental Chemistry, University of Szeged, Rerrich Béla tér 1., Szeged, H-6720, Hungary*

E-mail: [atoth@chem.u-szeged.hu](mailto:atoth@chem.u-szeged.hu)

## Contents

|                                                   |    |
|---------------------------------------------------|----|
| S1 Raman spectra of calcite and vaterite crystals | S2 |
| S2 The surface growth rates of the particles      | S3 |
| S3 The side growth rates of calcite crystals      | S7 |
| References                                        | S9 |

## S1 Raman spectra of calcite and vaterite crystals

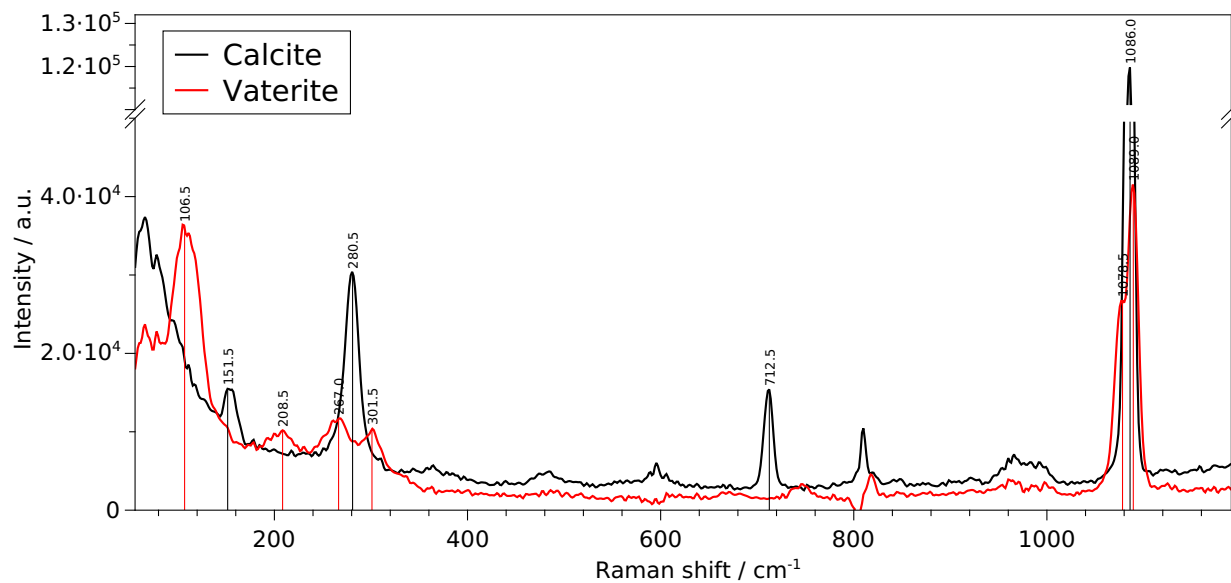

Figure S1: The Raman spectra of the calcite and vaterite crystals. The measurements were carried out by a SENTERRA II Compact Raman microscope, using a 785 nm laser excitation wavelength with a laser power of 100 mW. Five spectra were averaged with the integration time set to 20 s.<sup>1</sup>

## S2 The surface growth rates of the particles

Table S1: The surface growth rates of the calcite particles at  $[\text{Ca}^{2+}]:[\text{CO}_3^{2-}] = 2:2$  ratio. The first number indicates the number of the experiment, the second one the investigated particle

| Particle | $100 r_A(\mu\text{m}^2/\text{s})$ | Particle | $100 r_A(\mu\text{m}^2/\text{s})$ | Particle | $100 r_A(\mu\text{m}^2/\text{s})$ |
|----------|-----------------------------------|----------|-----------------------------------|----------|-----------------------------------|
| 1.1.     | $19.96 \pm 0.20$                  | 2.1.     | $12.10 \pm 0.53$                  | 3.1.     | $3.32 \pm 0.03$                   |
| 1.2.     | $14.86 \pm 0.45$                  | 2.2.     | $10.06 \pm 0.20$                  | 3.2.     | $10.19 \pm 0.06$                  |
| 1.3.     | $1.26 \pm 0.01$                   | 2.3.     | $8.15 \pm 0.13$                   | 3.3.     | $7.23 \pm 0.23$                   |
| 1.4.     | $11.24 \pm 0.10$                  | 2.4.     | $4.54 \pm 0.03$                   | 3.4.     | $7.92 \pm 0.07$                   |
| 1.5.     | $2.78 \pm 0.03$                   | 2.5.     | $4.36 \pm 0.11$                   | 3.5.     | $2.40 \pm 0.04$                   |
| 1.6.     | $7.40 \pm 0.07$                   | 2.6.     | $7.75 \pm 0.10$                   | 3.6.     | $8.81 \pm 0.15$                   |
| 1.7.     | $6.27 \pm 0.13$                   | 2.7.     | $10.95 \pm 0.26$                  | 3.7.     | $3.90 \pm 0.06$                   |
| 1.8.     | $4.00 \pm 0.06$                   | 2.8.     | $3.62 \pm 0.03$                   | 3.8.     | $7.41 \pm 0.13$                   |
|          |                                   | 2.9.     | $5.40 \pm 0.03$                   | 3.9.     | $2.49 \pm 0.02$                   |
|          |                                   |          |                                   | 3.10.    | $1.02 \pm 0.05$                   |

Table S2: The surface growth rates of calcite particles at  $[\text{Ca}^{2+}]:[\text{CO}_3^{2-}] = 1:2$  ratio. The first number indicates the number of the experiment, the second one the investigated particle

| Particle | $100 r_A(\mu\text{m}^2/\text{s})$ | Particle | $100 r_A(\mu\text{m}^2/\text{s})$ | Particle | $100 r_A(\mu\text{m}^2/\text{s})$ |
|----------|-----------------------------------|----------|-----------------------------------|----------|-----------------------------------|
| 1.1.     | $8.22 \pm 0.07$                   | 2.1.     | $10.94 \pm 0.16$                  | 3.1.     | $15.40 \pm 0.11$                  |
| 1.2.     | $23.85 \pm 0.19$                  | 2.2.     | $10.92 \pm 0.13$                  | 3.2.     | $16.97 \pm 0.19$                  |
| 1.3.     | $9.93 \pm 0.08$                   | 2.3.     | $18.73 \pm 0.13$                  | 3.3.     | $17.02 \pm 0.25$                  |
| 1.4.     | $2.42 \pm 0.07$                   | 2.4.     | $5.72 \pm 0.06$                   | 3.4.     | $9.86 \pm 0.07$                   |
| 1.5.     | $4.04 \pm 0.03$                   | 2.5.     | $4.66 \pm 0.05$                   | 3.5.     | $19.00 \pm 0.24$                  |
| 1.6.     | $7.63 \pm 0.08$                   | 2.6.     | $5.89 \pm 0.03$                   | 3.6.     | $7.25 \pm 0.03$                   |
| 1.7.     | $7.25 \pm 0.17$                   | 2.7.     | $3.88 \pm 0.05$                   | 3.7.     | $1.74 \pm 0.01$                   |
| 1.8.     | $3.34 \pm 0.03$                   | 2.8.     | $2.47 \pm 0.01$                   | 3.8.     | $5.18 \pm 0.04$                   |
| 1.9.     | $1.72 \pm 0.03$                   |          |                                   |          |                                   |

Table S3: The surface growth rates of calcite particles at  $[\text{Ca}^{2+}]:[\text{CO}_3^{2-}] = 2:1$  ratio. The first number indicates the number of the experiment, the second one the investigated particle

| Particle | $100 r_A(\mu\text{m}^2/\text{s})$ | Particle | $100 r_A(\mu\text{m}^2/\text{s})$ | Particle | $100 r_A(\mu\text{m}^2/\text{s})$ |
|----------|-----------------------------------|----------|-----------------------------------|----------|-----------------------------------|
| 1.1.     | $14.76 \pm 0.18$                  | 2.1.     | $11.59 \pm 0.09$                  | 3.1.     | $23.50 \pm 0.20$                  |
| 1.2.     | $17.83 \pm 0.09$                  | 2.2.     | $12.18 \pm 0.13$                  | 3.2.     | $12.27 \pm 0.07$                  |
| 1.3.     | $9.55 \pm 0.10$                   | 2.3.     | $16.28 \pm 0.12$                  | 3.3.     | $14.04 \pm 0.16$                  |
| 1.4.     | $12.07 \pm 0.06$                  | 2.4.     | $13.48 \pm 0.06$                  | 3.4.     | $11.60 \pm 0.10$                  |
| 1.5.     | $4.50 \pm 0.09$                   | 2.5.     | $7.66 \pm 0.08$                   | 3.5.     | $3.76 \pm 0.04$                   |
| 1.6.     | $3.69 \pm 0.20$                   | 2.6.     | $23.59 \pm 0.25$                  | 3.6.     | $11.25 \pm 0.08$                  |
| 1.7.     | $4.23 \pm 0.08$                   | 2.7.     | $5.97 \pm 0.27$                   | 3.7.     | $9.05 \pm 0.19$                   |
| 1.8.     | $1.34 \pm 0.03$                   | 2.8.     | $19.82 \pm 0.59$                  | 3.8.     | $5.36 \pm 0.07$                   |
| 1.9.     | $0.71 \pm 0.01$                   | 2.9.     | $15.32 \pm 0.66$                  | 3.9.     | $6.35 \pm 0.28$                   |
| 1.10.    | $4.09 \pm 0.09$                   | 2.10.    | $9.79 \pm 0.04$                   | 3.10.    | $5.67 \pm 0.10$                   |
| 1.11.    | $4.04 \pm 0.05$                   | 2.11.    | $14.37 \pm 0.17$                  | 3.11.    | $2.72 \pm 0.02$                   |
|          |                                   | 2.12.    | $3.21 \pm 0.02$                   |          |                                   |
|          |                                   | 2.13.    | $9.89 \pm 0.26$                   |          |                                   |
|          |                                   | 2.14.    | $8.25 \pm 0.62$                   |          |                                   |
|          |                                   | 2.15.    | $5.26 \pm 0.19$                   |          |                                   |
|          |                                   | 2.16.    | $4.55 \pm 0.23$                   |          |                                   |
|          |                                   | 2.17.    | $2.13 \pm 0.04$                   |          |                                   |
|          |                                   | 2.18.    | $2.38 \pm 0.04$                   |          |                                   |
|          |                                   | 2.19.    | $4.15 \pm 0.06$                   |          |                                   |
|          |                                   | 2.20.    | $6.25 \pm 0.07$                   |          |                                   |
|          |                                   | 2.21.    | $1.81 \pm 0.06$                   |          |                                   |
|          |                                   | 2.22.    | $2.58 \pm 0.05$                   |          |                                   |

Table S4: The surface growth rates of the vaterite particles at  $[\text{Ca}^{2+}]:[\text{CO}_3^{2-}] = 2:1$  ratio. The first number indicates the number of the experiment, the second one the investigated particle

| Particle | $100 r_A(\mu\text{m}^2/\text{s})$ | Particle | $100 r_A(\mu\text{m}^2/\text{s})$ | Particle | $100 r_A(\mu\text{m}^2/\text{s})$ |
|----------|-----------------------------------|----------|-----------------------------------|----------|-----------------------------------|
| 1.1.     | $28.90 \pm 0.45$                  | 2.1.     | $15.45 \pm 0.13$                  | 3.1.     | $14.19 \pm 0.11$                  |
| 1.2.     | $23.53 \pm 0.24$                  | 2.2.     | $3.79 \pm 0.06$                   | 3.2.     | $21.84 \pm 0.69$                  |
| 1.3.     | $27.31 \pm 0.99$                  | 2.3.     | $6.65 \pm 0.67$                   | 3.3.     | $8.98 \pm 0.30$                   |
| 1.4.     | $15.77 \pm 0.72$                  | 2.4.     | $9.72 \pm 0.91$                   | 3.4.     | $6.36 \pm 0.80$                   |
| 1.5.     | $29.22 \pm 1.15$                  |          |                                   | 3.5.     | $6.38 \pm 0.32$                   |
| 1.6.     | $45.43 \pm 2.01$                  |          |                                   |          |                                   |
| 1.7.     | $31.66 \pm 0.54$                  |          |                                   |          |                                   |
| 1.8.     | $21.12 \pm 1.04$                  |          |                                   |          |                                   |
| 1.9.     | $13.99 \pm 1.98$                  |          |                                   |          |                                   |
| 1.10.    | $11.99 \pm 0.39$                  |          |                                   |          |                                   |
| 1.11.    | $10.89 \pm 1.40$                  |          |                                   |          |                                   |
| 1.12.    | $13.12 \pm 0.37$                  |          |                                   |          |                                   |
| 1.13.    | $12.14 \pm 0.44$                  |          |                                   |          |                                   |
| 1.14.    | $11.08 \pm 0.19$                  |          |                                   |          |                                   |
| 1.15.    | $6.56 \pm 2.28$                   |          |                                   |          |                                   |
| 1.16.    | $10.05 \pm 0.19$                  |          |                                   |          |                                   |
| 1.17.    | $4.39 \pm 0.27$                   |          |                                   |          |                                   |
| 1.18.    | $7.52 \pm 0.13$                   |          |                                   |          |                                   |
| 1.19.    | $2.34 \pm 0.14$                   |          |                                   |          |                                   |

### S3 The side growth rates of calcite crystals

Table S5: The side growth rates of the calcite crystals in  $\mu\text{m}/\text{min}$  at  $[\text{Ca}^{2+}]:[\text{CO}_3^{2-}] = 2:2$  ratio. The first number indicates the number of the experiment, the second one the investigated particle

| Particle | $r_l$            | $r_l$            | $r_l$            | $r_l$            |
|----------|------------------|------------------|------------------|------------------|
| 1.1.     | $0.489\pm 0.015$ | -                | $0.645\pm 0.014$ | $0.438\pm 0.013$ |
| 1.2.     | $0.186\pm 0.003$ | $0.161\pm 0.017$ | $0.185\pm 0.002$ | $0.213\pm 0.027$ |
| 1.3.     | $0.038\pm 0.002$ | $0.050\pm 0.001$ | $0.038\pm 0.002$ | $0.057\pm 0.001$ |
| 1.4.     | $0.121\pm 0.001$ | $0.113\pm 0.001$ | $0.114\pm 0.001$ | $0.118\pm 0.002$ |
| 1.5.     | $0.056\pm 0.003$ | $0.081\pm 0.003$ | $0.039\pm 0.003$ | $0.094\pm 0.004$ |
| 1.6.     | $0.099\pm 0.002$ | $0.100\pm 0.003$ | $0.088\pm 0.002$ | $0.091\pm 0.003$ |
| 1.7.     | $0.054\pm 0.003$ | $0.062\pm 0.004$ | $0.060\pm 0.003$ | $0.064\pm 0.003$ |
| 1.8.     | $0.043\pm 0.003$ | $0.043\pm 0.004$ | $0.087\pm 0.003$ | $0.026\pm 0.003$ |
| 2.1.     | $0.175\pm 0.030$ | $0.182\pm 0.021$ | $0.247\pm 0.021$ | $0.199\pm 0.037$ |
| 2.2.     | $0.212\pm 0.006$ | $0.309\pm 0.012$ | $0.180\pm 0.010$ | $0.288\pm 0.009$ |
| 2.3.     | $0.204\pm 0.013$ | $0.257\pm 0.012$ | $0.213\pm 0.013$ | $0.242\pm 0.012$ |
| 2.4.     | $0.219\pm 0.001$ | $0.121\pm 0.009$ | $0.261\pm 0.010$ | $0.119\pm 0.002$ |
| 2.5.     | $0.130\pm 0.007$ | $0.136\pm 0.010$ | $0.124\pm 0.007$ | $0.146\pm 0.008$ |
| 2.6.     | $0.282\pm 0.004$ | $0.336\pm 0.006$ | $0.279\pm 0.005$ | $0.318\pm 0.004$ |
| 2.7.     | $0.292\pm 0.009$ | $0.208\pm 0.010$ | $0.274\pm 0.012$ | $0.214\pm 0.010$ |
| 2.8.     | $0.070\pm 0.002$ | $0.075\pm 0.002$ | $0.062\pm 0.002$ | $0.072\pm 0.002$ |
| 2.9.     | $0.061\pm 0.002$ | $0.095\pm 0.004$ | $0.071\pm 0.002$ | $0.086\pm 0.002$ |
| 3.1.     | $0.153\pm 0.016$ | $0.144\pm 0.006$ | $0.154\pm 0.007$ | $0.135\pm 0.004$ |
| 3.2.     | $0.306\pm 0.013$ | $0.438\pm 0.011$ | $0.329\pm 0.020$ | $0.416\pm 0.008$ |
| 3.3.     | $0.197\pm 0.010$ | $0.154\pm 0.008$ | $0.195\pm 0.009$ | $0.133\pm 0.020$ |
| 3.4.     | $0.181\pm 0.005$ | $0.137\pm 0.004$ | $0.174\pm 0.004$ | $0.119\pm 0.004$ |
| 3.5.     | $0.080\pm 0.005$ | $0.097\pm 0.007$ | $0.101\pm 0.010$ | $0.084\pm 0.003$ |
| 3.6.     | $0.132\pm 0.004$ | $0.152\pm 0.004$ | $0.140\pm 0.003$ | $0.169\pm 0.003$ |
| 3.7.     | $0.110\pm 0.003$ | $0.092\pm 0.003$ | $0.104\pm 0.004$ | $0.100\pm 0.002$ |
| 3.8.     | $0.129\pm 0.003$ | $0.145\pm 0.003$ | $0.116\pm 0.005$ | $0.152\pm 0.004$ |
| 3.9.     | $0.057\pm 0.001$ | $0.039\pm 0.001$ | $0.057\pm 0.001$ | $0.039\pm 0.001$ |
| 3.10.    | $0.012\pm 0.002$ | $0.040\pm 0.004$ | $0.009\pm 0.002$ | $0.037\pm 0.002$ |

Table S6: The side growth rates of the calcite crystals in  $\mu\text{m}/\text{min}$  at  $[\text{Ca}^{2+}]:[\text{CO}_3^{2-}] = 1:2$  ratio. The first number indicates the number of the experiment while the second one the examined particle

| Particle | $r_l$       | $r_l$       | $r_l$       | $r_l$       |
|----------|-------------|-------------|-------------|-------------|
| 1.1.     | 0.433±0.013 | 0.430±0.020 | 0.476±0.016 | 0.454±0.013 |
| 1.2.     | 0.868±0.014 | 0.730±0.020 | 0.830±0.020 | 0.813±0.016 |
| 1.3.     | 0.251±0.007 | 0.300±0.005 | 0.208±0.005 | 0.273±0.011 |
| 1.4.     | 0.084±0.010 | 0.052±0.002 | 0.094±0.007 | 0.064±0.002 |
| 1.5.     | 0.074±0.002 | 0.101±0.003 | 0.073±0.003 | 0.125±0.002 |
| 1.6.     | 0.121±0.003 | 0.115±0.002 | 0.117±0.002 | 0.143±0.002 |
| 1.7.     | 0.126±0.002 | 0.158±0.002 | 0.104±0.003 | 0.155±0.002 |
| 1.8.     | 0.055±0.001 | 0.070±0.002 | 0.040±0.001 | 0.043±0.001 |
| 1.9.     | 0.081±0.007 | 0.055±0.009 | 0.084±0.004 | 0.038±0.006 |
| 2.1.     | 0.296±0.004 | 0.269±0.005 | 0.284±0.006 | 0.275±0.004 |
| 2.2.     | 0.381±0.008 | 0.369±0.010 | 0.366±0.007 | 0.386±0.008 |
| 2.3.     | 0.250±0.002 | 0.286±0.005 | 0.253±0.002 | 0.273±0.006 |
| 2.4.     | 0.144±0.003 | 0.120±0.002 | 0.122±0.002 | 0.129±0.002 |
| 2.5.     | 0.122±0.001 | 0.128±0.003 | 0.111±0.003 | 0.130±0.002 |
| 2.6.     | 0.120±0.002 | 0.195±0.004 | 0.051±0.002 | 0.059±0.003 |
| 2.7.     | 0.061±0.005 | 0.092±0.003 | 0.049±0.003 | 0.096±0.002 |
| 2.8.     | 0.075±0.002 | 0.049±0.002 | 0.086±0.003 | 0.017±0.001 |
| 3.1.     | 0.272±0.002 | 0.223±0.002 | 0.293±0.002 | 0.261±0.002 |
| 3.2.     | 0.293±0.005 | 0.190±0.004 | 0.419±0.011 | 0.313±0.004 |
| 3.3.     | 0.419±0.005 | 0.492±0.009 | 0.468±0.013 | 0.450±0.007 |
| 3.4.     | 0.151±0.002 | 0.157±0.014 | 0.160±0.002 | 0.178±0.006 |
| 3.5.     | 0.374±0.009 | 0.288±0.008 | 0.471±0.014 | 0.300±0.008 |
| 3.6.     | 0.082±0.001 | 0.142±0.001 | 0.098±0.001 | 0.129±0.001 |
| 3.7.     | 0.050±0.002 | 0.030±0.002 | 0.024±0.003 | 0.050±0.002 |
| 3.8.     | 0.072±0.002 | 0.123±0.002 | 0.133±0.005 | 0.117±0.002 |

Table S7: The side growth rates of the calcite crystals in  $\mu\text{m}/\text{min}$  at  $[\text{Ca}^{2+}]:[\text{CO}_3^{2-}] = 2:1$  ratio. The first number indicates the number of the experiment, the second one the investigated particle

| Particle | $r_l$       | $r_l$       | $r_l$       | $r_l$       |
|----------|-------------|-------------|-------------|-------------|
| 1.1.     | 0.220±0.005 | 0.221±0.003 | 0.211±0.005 | 0.226±0.003 |
| 1.2.     | 0.263±0.004 | 0.270±0.003 | 0.283±0.003 | 0.328±0.005 |
| 1.3.     | 0.156±0.003 | 0.175±0.002 | 0.146±0.003 | 0.176±0.002 |
| 1.4.     | 0.213±0.010 | 0.282±0.008 | 0.187±0.008 | 0.284±0.011 |
| 1.5.     | 0.132±0.005 | 0.101±0.004 | 0.125±0.004 | 0.057±0.006 |
| 1.6.     | 0.059±0.006 | 0.095±0.008 | 0.073±0.010 | 0.085±0.007 |
| 1.7.     | 0.149±0.011 | 0.068±0.005 | 0.158±0.006 | 0.051±0.006 |
| 1.8.     | 0.036±0.002 | 0.043±0.002 | 0.027±0.002 | 0.050±0.002 |
| 1.9.     | 0.014±0.001 | 0.018±0.002 | 0.022±0.002 | 0.017±0.002 |
| 1.10.    | 0.042±0.002 | 0.052±0.002 | 0.040±0.002 | 0.055±0.002 |
| 1.11.    | 0.054±0.001 | 0.046±0.001 | 0.058±0.002 | 0.048±0.001 |
| 2.1.     | 0.302±0.004 | 0.293±0.007 | 0.311±0.005 | 0.303±0.008 |
| 2.2.     | 0.277±0.005 | 0.465±0.007 | 0.295±0.007 | 0.479±0.006 |
| 2.3.     | 0.188±0.011 | 0.290±0.007 | 0.217±0.010 | 0.290±0.006 |
| 2.4.     | 0.302±0.014 | 0.257±0.009 | 0.297±0.010 | 0.273±0.009 |
| 2.5.     | 0.244±0.012 | 0.290±0.007 | 0.233±0.011 | 0.309±0.006 |
| 2.6.     | 0.268±0.007 | 0.396±0.004 | 0.318±0.018 | 0.394±0.009 |
| 2.7.     | 0.004±0.018 | 0.331±0.019 | 0.066±0.017 | 0.287±0.020 |
| 2.8.     | 0.270±0.013 | 0.321±0.016 | 0.285±0.018 | 0.340±0.013 |
| 2.9.     | 0.367±0.020 | 0.259±0.017 | 0.423±0.016 | 0.248±0.018 |
| 2.10.    | 0.432±0.036 | 0.142±0.003 | 0.371±0.004 | 0.133±0.006 |
| 2.11.    | 0.285±0.004 | 0.250±0.005 | 0.290±0.005 | 0.249±0.004 |
| 2.12.    | 0.118±0.002 | 0.132±0.002 | 0.119±0.002 | 0.123±0.002 |
| 2.13.    | 0.161±0.014 | 0.110±0.020 | 0.171±0.016 | 0.163±0.033 |
| 2.14.    | 0.068±0.033 | 0.139±0.020 | 0.083±0.013 | 0.168±0.027 |
| 2.15.    | 0.079±0.007 | 0.177±0.009 | 0.078±0.007 | 0.187±0.009 |
| 2.16.    | 0.113±0.008 | 0.056±0.006 | 0.074±0.007 | 0.056±0.005 |
| 2.17.    | 0.036±0.004 | 0.030±0.002 | 0.036±0.004 | 0.028±0.003 |
| 2.18.    | 0.010±0.007 | 0.156±0.013 | 0.010±0.008 | 0.074±0.018 |
| 2.19.    | 0.089±0.004 | 0.043±0.002 | 0.081±0.003 | 0.052±0.003 |
| 2.20.    | 0.073±0.004 | 0.089±0.003 | 0.081±0.003 | 0.087±0.003 |
| 2.21.    | 0.032±0.003 | 0.030±0.003 | 0.032±0.002 | 0.028±0.004 |
| 2.22.    | 0.026±0.003 | 0.027±0.006 | 0.032±0.002 | 0.036±0.002 |
| 3.1.     | 0.593±0.013 | 0.552±0.010 | 0.552±0.010 | 0.606±0.015 |
| 3.2.     | 0.270±0.005 | 0.286±0.007 | 0.251±0.007 | 0.286±0.006 |
| 3.3.     | 0.545±0.011 | 0.508±0.008 | 0.555±0.043 | 0.514±0.010 |
| 3.4.     | 0.190±0.004 | 0.181±0.003 | 0.179±0.007 | 0.191±0.005 |
| 3.5.     | 0.152±0.004 | 0.066±0.004 | 0.158±0.005 | 0.069±0.004 |
| 3.6.     | 0.144±0.003 | 0.147±0.002 | 0.141±0.002 | 0.139±0.003 |
| 3.7.     | 0.111±0.006 | 0.173±0.004 | 0.124±0.009 | 0.181±0.006 |
| 3.8.     | 0.084±0.003 | 0.070±0.003 | 0.073±0.002 | 0.062±0.003 |
| 3.9.     | 0.100±0.004 | 0.073±0.003 | 0.074±0.003 | 0.059±0.002 |
| 3.10.    | 0.059±0.002 | 0.068±0.003 | 0.065±0.003 | 0.060±0.003 |
| 3.11.    | 0.056±0.002 | 0.049±0.002 | 0.058±0.002 | 0.047±0.002 |

## References

- (1) F. C. Donnelly, F. Purcell-Milton, V. Framont, O. Cleary, P. W. Dunne, Y. K. Gun'ko, *Synthesis of  $\text{CaCO}_3$  nano- and micro-particles by dry ice carbonation*, Chem. Commun. **53**, 6657-6660 (2017).
